# Supplementary material
Source: publisher figshare collection journal article supplement (https://acs.figshare.com/ndownloader/files/31259931)
Supplement: Supplementary file 1 [file 31259931]

**Supporting Information for**

**Improved performance and mitigated internal  
concentration polarization of thin-film composite  
forward osmosis membrane with  
polysulfone/polyaniline substrate**

*Xing Wu,<sup>†</sup> Thomas M. Kohl,<sup>†</sup> John Tsanaktsidis,<sup>†</sup> Zongli Xie<sup>\*†</sup>*

<sup>†</sup>CSIRO Manufacturing, Private bag 10, Clayton South, Victoria 3169, Australia

<sup>\*</sup>Correspondence: zongli.xie@csiro.au

### Filtration performances of PSf/PANI substrates

The water flux ( $J_0$ ) and BSA rejection ( $R_{BSA}$ ) of as-prepared PSf/PANI substrates were evaluated by a dead-end filtration system using DI water and BSA solution ( $1.0 \text{ g}\cdot\text{L}^{-1}$ ) as the feed solution. The teste was conducted at 2.0 bar. The water flux ( $J_0$ ) and BSA rejection ratio ( $R_{BSA}$ ) were estimated based on the filtration test with Equation (2):

$$J_0 = \frac{\Delta V}{A_m \Delta t} \quad (1)$$

where  $\Delta V$  is the volume of permeate water, and  $\Delta t$  is the filtration time.

$$R_{BSA} = \left(1 - \frac{C_{p\_BSA}}{C_{f\_BSA}}\right) \times 100 \quad (2)$$

where  $C_{p\_BSA}$  and  $C_{f\_BSA}$  are the BSA concentrations of the permeate solution and the feed solution respectively, which were measured by UV-vis spectrometer with a wavelength of 280 nm.<sup>1</sup>

**Table S1.** Compositions of casting solutions of substrates.

| Membrane | PSf (wt.%) | PANI (wt.%) | PVP (wt.%) | NMP (wt.%) |
|----------|------------|-------------|------------|------------|
| S-0      | 17.5       | 0.0         | 0.5        | 82.0       |
| S-0.4    | 17.5       | 0.4         | 0.5        | 81.6       |
| S-0.6    | 17.5       | 0.6         | 0.5        | 81.4       |
| S-0.8    | 17.5       | 0.8         | 0.5        | 81.2       |

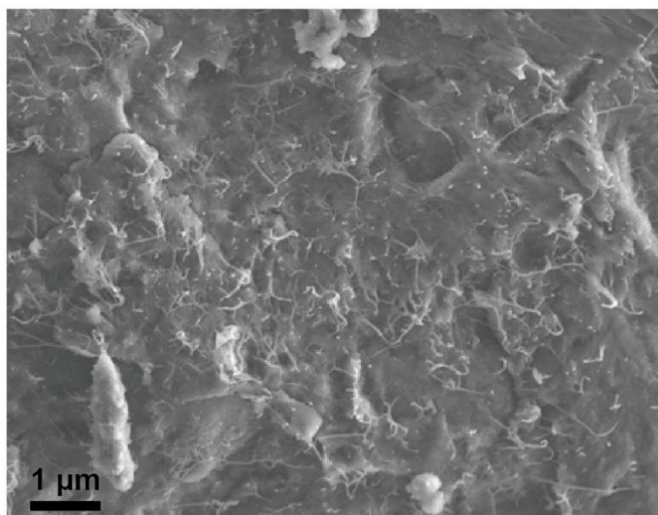

**Figure S1.** SEM image of PANI.

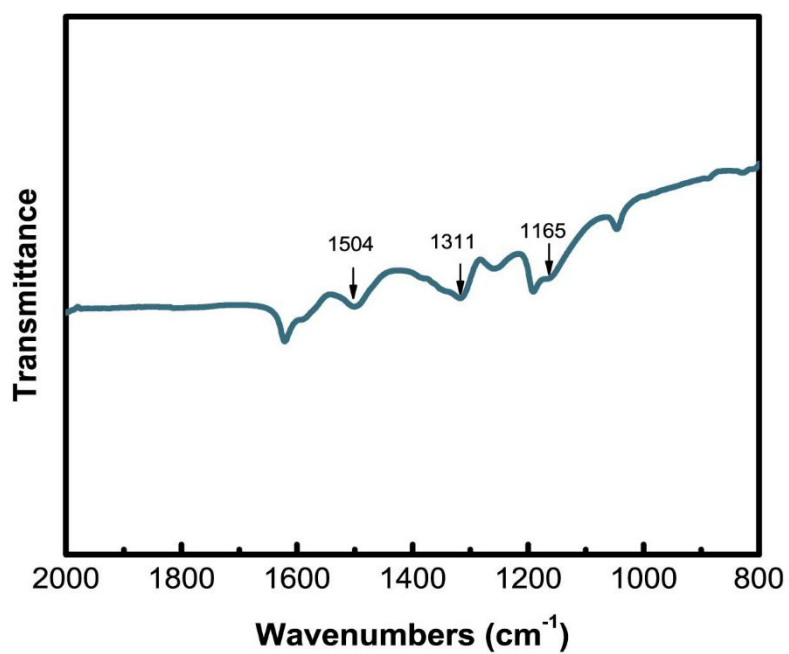

**Figure S2.** FTIR spectrum of PANI.

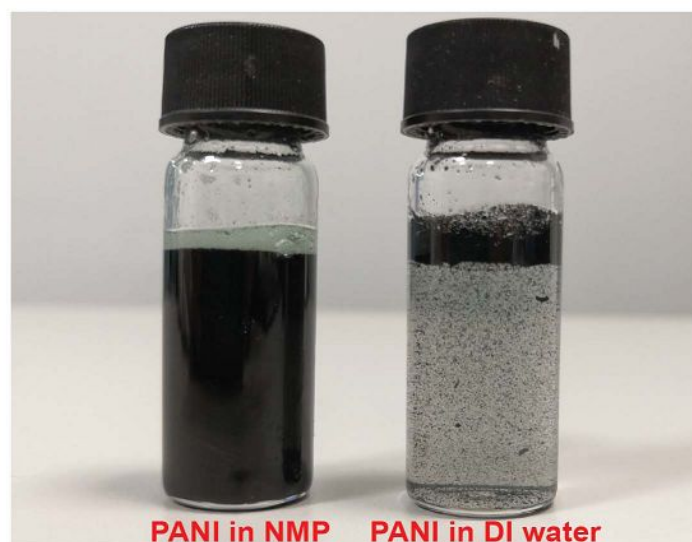

**Figure S3.** Photographs of PANI/NMP and PANI/DI water mixtures.

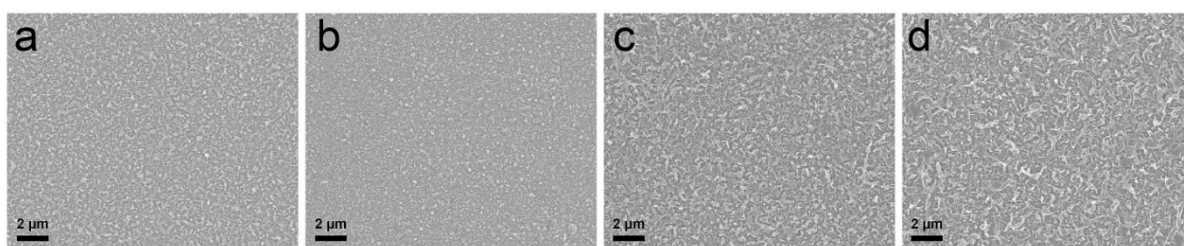

**Figure S4.** Surface SEM images with a small magnification time of (a) FO-0 membrane, (b) FO-0.4 membrane, (c) FO-0.6 membrane, and (d) FO-0.8 membrane.

**Table S2.** Pore size of bottom surfaces of PSf and PSf/PANI Substrates.

| Membrane | Average pore size ( $\mu\text{m}$ ) | Maximum pore size ( $\mu\text{m}$ ) | Minimum pore size ( $\mu\text{m}$ ) |
|----------|-------------------------------------|-------------------------------------|-------------------------------------|
| S-0      | 0.08                                | 0.25                                | 0.02                                |
| S-0.4    | 0.10                                | 0.38                                | 0.03                                |
| S-0.6    | 0.16                                | 0.57                                | 0.03                                |
| S-0.8    | 0.23                                | 0.76                                | 0.03                                |

## REFERENCES

(1) Boributh, S.; Chanachai, A.; Jiratananon, R. Modification of PVDF membrane by chitosan solution for reducing protein fouling. *J. Membr. Sci.* **2009**, 342, (1-2), 97-104.
